# Supplementary material for: Dry ice-mediated rational synthesis of edge-carboxylated crumpled graphene nanosheets for selective and prompt hydrolysis of cellulose and eucalyptus lignocellulose under ambient reaction conditions
Source: Royal Society of Chemistry journal article supplement (doi:10.1039/d0gc01561j), 2020-01-01
Supplement: d0gc01561j1.pdf [file d0gc01561j1.pdf]

## Supporting information

### Hydrolysis of Eucalyptus Lignocellulose using ECG-48 catalyst

#### Pretreatment process of eucalyptus lignocellulose

ECG-48 (0.5 g) and eucalyptus Lignocellulose (8.0 g) were milled together in a ceramic pot (1.5 L, with 0.5 Kg of alumina balls ( $\Phi = 1.5$  cm)) at 500 rpm for 1 h. Then, the milled powder was mixed with an aqueous solution of HCl (40 mL, 120 ppm) or H<sub>2</sub>O (40 mL) under ultrasonic treatment (frequency of 20 kHz and 200 W power) for 20 min. The same pretreatment process was used for ECG-24, ECG-36, and ECG-72 catalysts.

#### Hydrolysis process eucalyptus lignocellulose using ECG-48 catalyst

After sonication, the obtained mixture was charged in the reactor (Hastelloy C-22 high-pressure reactor equipped with an agitator operating at 500 rpm and thermocouple) followed by heating to 180 °C (10° C min<sup>-1</sup>) and promptly cooled down to the room temperature. Then, the reaction mixture was separated into solid and liquid by centrifugation and decantation. The aqueous phase was analyzed using high-performance liquid chromatography ((HPLC, Agilent 1260 series, USA) with an HPX-87H column (300×7.8mm, Bio-Rad, USA). The percentage (%) of glucose or xylose yield is calculated using the following equation  $\text{Glucose (Xylose) yield (\%)} = [(A/B) \times 100]$  Equation 1

Where A is the moles of glucose produced by hydrolysis, and B is the glucose in pure cellulose. The selectivity of glucose (xylose) (Si) was estimated using the following equation

$$S_i = [TC_{i,output} / TC_{input}] \times 100 \quad \text{Equation 2}$$

where  $TC_{i,output}$ , and  $TC_{input}$  are the total carbon in the products and input.

The selectivity of total sugars ( $S_{TS}$ ) was calculated using the following equation along with consideration carbon balance taking into account all the degradation products ( $C_{dp}$ )

$$S_{TS} = [TC_{input} - C_{dp} / TC_{input}] \times 100 \quad \text{Equation 3}$$

All the conversion yields of eucalyptus lignocellulose were calculated based on the carbon balance. The same hydrolysis process was used for ECG-24, ECG-36, and ECG-72 catalysts.

#### Hydrolysis Process using H<sub>2</sub>O or HCl

##### Pretreatment process

ECG-48 (0.5 g) was milled in a ceramic pot (1.5 L, with 0.5 Kg of alumina balls ( $\Phi = 1.5$  cm)) at 500 rpm for 1 h and then 0.5 g of the milled powder was dispersed in an aqueous solution of HCl (40 mL, 120 ppm) or H<sub>2</sub>O (40 mL) under ultrasonic (frequency of 20 kHz and 200 W power) treatment for 20 min. Then the hydrolysis process for cellulose and eucalyptus lignocellulose was carried out by the same method mentioned in the above.

#### Adsorption of glucose

ECG -48 (75 mg) was added to an aqueous solution of glucose (10 mL, 0.5 mg/mL) under vigorous stirring at room temperature for 6 h. Then the obtained mixture was filtered through a polyvinylidene difluoride (PVDF) 0.20 mm mesh membrane, and the concentration of glucose in the solution was analyzed using HPLC (Shimadzu LC-20AD with a refractive index (RI) detector) with a Phenomenex Rezex RPM-Monosaccharide Pb<sup>2+</sup> column ( $\phi 7.8_{300}$  mm, mobile phase: water at 0.6 mL/min, 343 k. The adsorbed glucose concentration on ECG-48 catalyst was calculated via material balance from the measured decrease in liquid-phase compared to original concentration before adsorption using the following equation

$$Y = [C_0 - C_1 / C_0] \times 100$$

Where Y is the adsorption ratio of carbon-based solid acids,  $C_0$  and  $C_1$  are the glucose concentration before and after adsorption, respectively.

#### Durability Test for recovery of ECG-48 catalyst

After each hydrolysis cycle, the reaction mixture was separated into solid and liquid by centrifugation and decantation to recover the ECG-48 catalyst. The aqueous phase was analyzed by high-performance liquid chromatography, while the solid powder was rinsed 5 times in a hot water solution (200 mL, 60 °C) for 20 min under vigorous shaking at 500 rpm, followed by centrifugation at 6000 rpm and washing with hot water solution (60 °C) until pH reached 4. The obtained powder was dried at 70°C for 4 h under air before being used again.<sup>1</sup> The reaction conditions and reactants concentrations remain constant in each run. To this end, the additive amount of fresh cellulose (300 mg), eucalyptus lignocellulose (300 mg), ECG-48 h (75.0 mg), HCl (10 ml of 120 ppm), double deionized water (10 mL, resistivity ~18 M $\Omega$  cm), and heating from 25 °C to 180 °C (12°/ min) for 20 min and then quickly cooled down to 25°C).

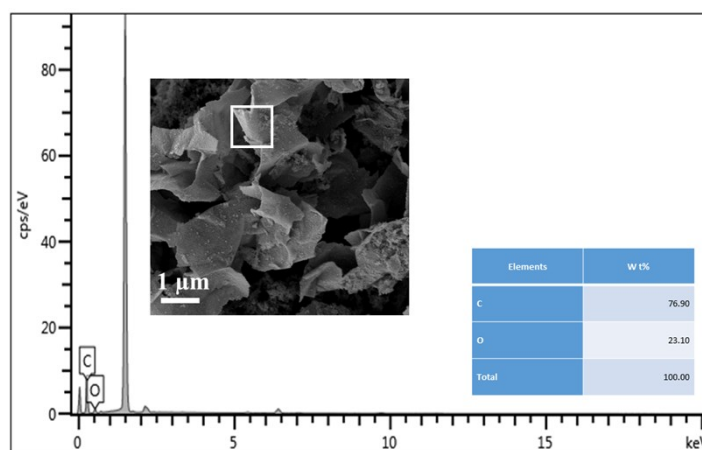

**Figure S1.** The EDX of ECG. The table and SEM image are shown as insets. The EDX was carried out on the marked area in the SEM image.

**Table S1** CHNOS elemental analysis of ECG catalyst

| Catalyst | Milling time (h) | C (%) | H (%)            | S (%) | N (%) | O (%) |
|----------|------------------|-------|------------------|-------|-------|-------|
| Graphite | 0                | 99.62 | BDL <sup>a</sup> | BDL   | BDL   | 0.15  |
| ECG-24   | 24               | 97.65 | 0.31             | 1.51  | BDL   | 2.00  |
| ECG-36   | 36               | 91.82 | 0.76             | 1.04  | BDL   | 4.03  |
| ECG-48   | 48               | 72.03 | 1.02             | 0.01  | BDL   | 26.45 |
| ECG-60   | 60               | 72.65 | 1.03             | BDL   | BDL   | 26.31 |
| ECG-72   | 72               | 71.61 | 1.09             | BDL   | BDL   | 26.65 |

BDL = Below detection limit.

**Table S2** The COOH content as a function of milling time determined using the conductometric titration approach. The adsorption of cellulose as a function of COOH content.

| Catalyst | Milling time (h) | ECG (Wt %) | COOH (mmol/g) | Glucose adsorption capacity (mg/g) |
|----------|------------------|------------|---------------|------------------------------------|
| Graphite | 0                | 2          | 0             | 40                                 |
| ECG-24   | 24               | 2          | 1.58          | 120                                |
| ECG-36   | 36               | 2          | 2             | 210                                |
| ECG-48   | 48               | 2          | 2.9           | 380                                |
| ECG-60   | 60               | 2          | 3.1           | 200                                |
| ECG-72   | 72               | 2          | 3.            | 190                                |

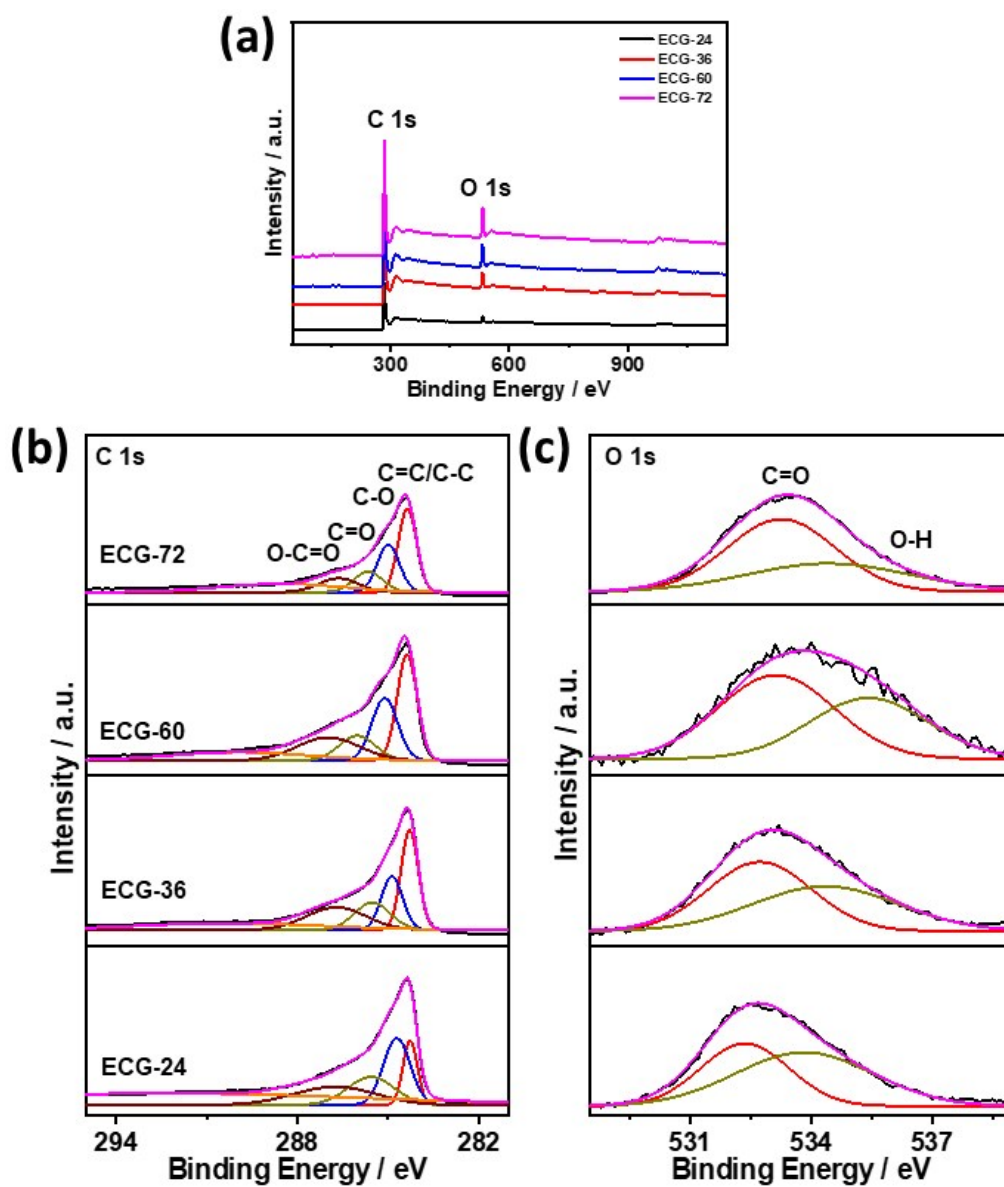

**Figure S2.** (a) XPS survey of ECG prepared under different milling times and (b and c) their high-resolution spectra of C 1s and O 1s, respectively. ECG-24, ECG-36, ECG-60, and ECG-72 catalysts prepared under milling times of 24, 36, 60, 72 h, respectively.

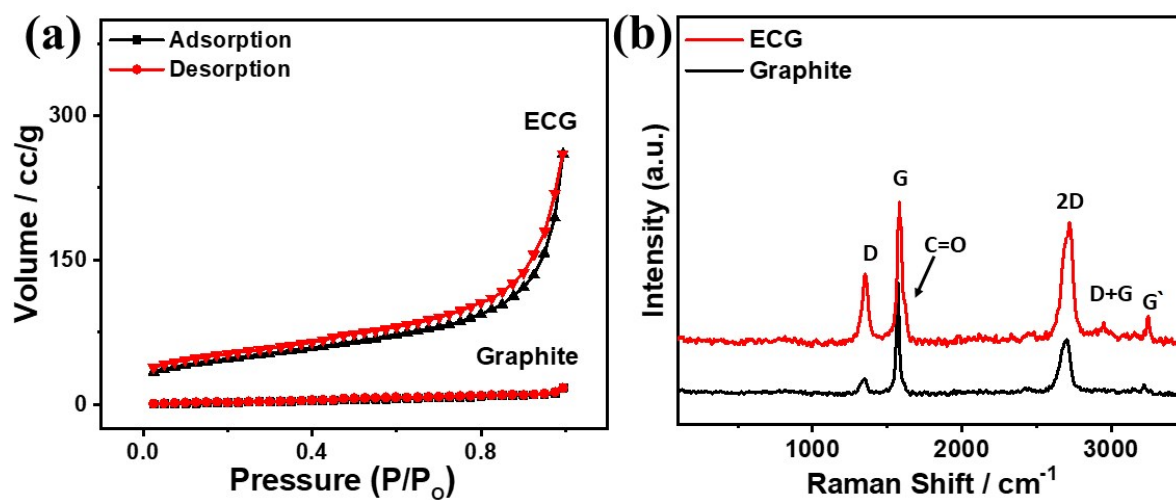

**Figure S3.** (a) N<sub>2</sub> isotherms physisorption spectra (b) Raman spectra of ECG compared to pure graphite.

**Table S3** The surface composition of ECG, prepared under different milling times determined by the XPS.

| Catalyst | Milling time (h) | C (%) | O (%) |
|----------|------------------|-------|-------|
| ECG-24   | 24               | 95.5  | 4.5   |
| ECG-36   | 36               | 90.8  | 9.2   |
| ECG-48   | 48               | 77.3  | 22.7  |
| ECG-60   | 60               | 79.4  | 20.6  |
| ECG-72   | 72               | 74.6  | 25.4  |

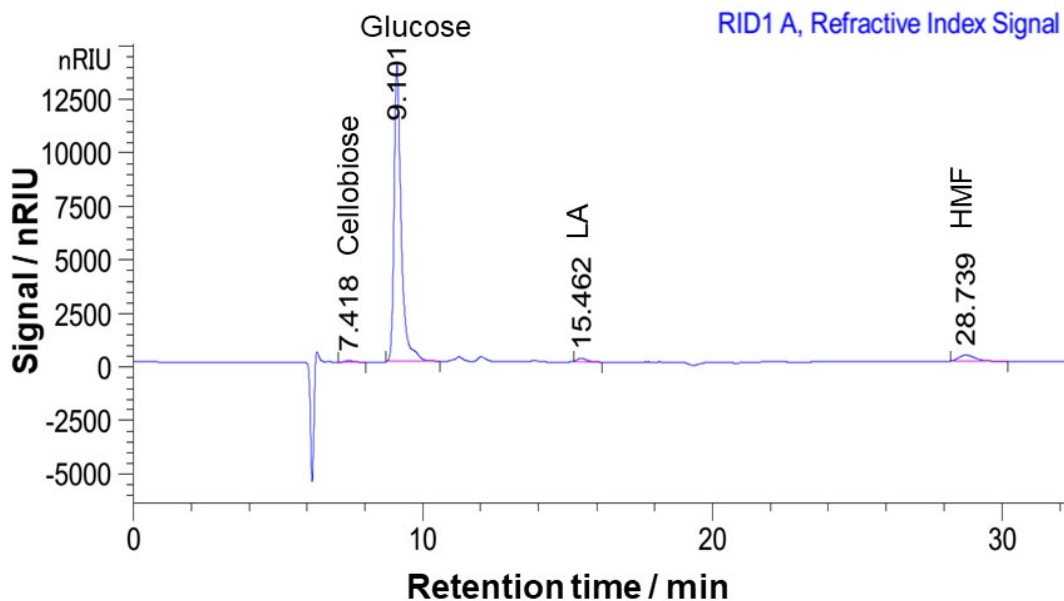

Figure S4 HPCL chromatogram of glucose, cellobiose, 5-hydroxymethylfurfural (HMF), and Levulinic acid (LA) produced on ECG-48 under typical conditions. Reaction conditions: cellulose (8 g), ECG-48 h (0.5 g), HCl (40 ml of 120 ppm), using ball-milling combined with sonication pretreatment. The reaction temperature was raised from 25 °C to 180 °C (10°/ min) for 20 min, then quickly cooled down to 25°C.

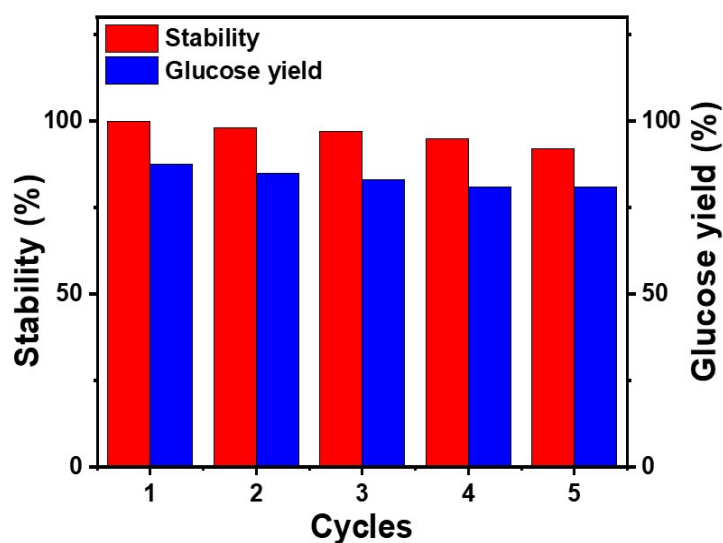

Figure S5. The durability testes for hydrolysis of cellulose and glucose yield measured at 180 °C on ECG-48 for 5 cycles under typical reaction conditions.

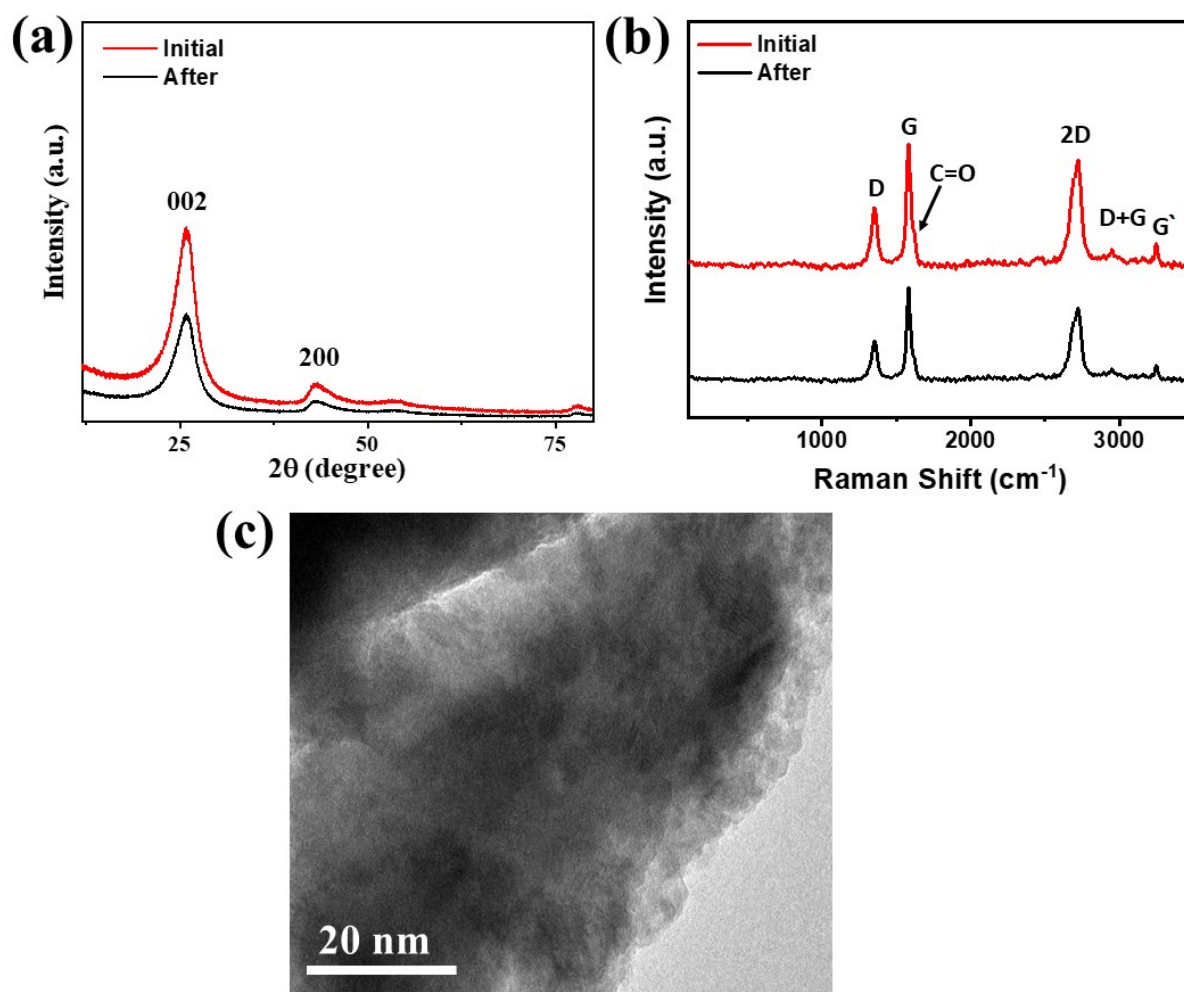

**Figure S6.** (a) PXRD, (b) Raman spectra, and (c) TEM image of ECG after the stability tests. Fresh prepared ECG-48 and ECG-48 after durability, showed the same (002) and (100) facet (a), same Raman modes (D, G, 2D, 2D+G, and G') (b), and 2D nanosheets with defective edges (c).

**Table S4** The glucose production on ECG-48 catalyst compared to previously reported carbon-based catalysts

| Type of Catalyst                                | Materials        | Glucose yield (%) | Time   | Temperature (°C) | References   |
|-------------------------------------------------|------------------|-------------------|--------|------------------|--------------|
| ECG-48+HCl                                      | Cellulose        | 87                | 20 min | 180 °C           | Current work |
| H <sub>3</sub> PW <sub>12</sub> O <sub>40</sub> | Cellulose        | 50                | 2h     | 180              | 3            |
| Ru/CMK-3                                        | Cellulose        | 31.2              | 15 min | 230              | 4            |
| 20% formic acid                                 | Wheat straw pulp | 40                | 7 min  | 220              | 5            |
| Activated carbon (AC-SO <sub>3</sub> H)         | Cellulose        | 40.5              | 24 h   | 150 °C           | 6            |
| 10 wt% Ru/CMK-3                                 | Cellulose        | 34.2              | 24 h   | 230              | 7            |
|                                                 | Cellulose        | 34.9              | 2 h    | 180              | 8            |

|                                                                       |            |       |        |     |    |
|-----------------------------------------------------------------------|------------|-------|--------|-----|----|
| 10 wt% Sn doped MgF <sub>2</sub>                                      |            |       |        |     |    |
| 10 wt % Sn doped hydroxylated MgF <sub>2</sub>                        | Cellulose  | 34.9  | 2 h    | 180 | 8  |
| Oxygenated E-carbon catalyst                                          | Eucalyptus | 77    | 1 h    | 215 | 9  |
| Sulfonated CMK-3                                                      | Cellulose  | 74.5  | 24     | 150 | 10 |
| Carbonated Graphen oxide bearing COOH and SO <sub>3</sub> H (10-SGOC) | Cellulose  | 17.76 | 5 h    | 160 | 11 |
| Amberlyst-15                                                          | Cellulose  | 67.2  | 2 h    | 170 | 12 |
| Sulfonated RGO/Gas-Liquid Interfacial Plasma                          | Cellulose  | 96.6  | 18 h   | 200 | 13 |
| Sulfonated RGO/Hydrothermal                                           | Cellulose  | 39.8  | 18 h   | 200 | 14 |
| SO <sub>3</sub> H/RGO                                                 | Cellulose  | 95    | 2 h    | 130 | 15 |
| silver mesoporous zeolite                                             | Cellulose  | 77    | 90 min | 180 | 16 |
| SO <sub>4</sub> <sup>2-</sup> -TiO <sub>2</sub>                       | Cellulose  | 21.8  | 30 min | 450 | 17 |
| Sulfonated carbonaceous solid acid                                    | Cellulose  | 30.9  | 12 h   | 170 | 19 |
| Pretreated rice straw                                                 | Cellulose  | 52.1  | 60 min | 200 | 18 |
| bamboo-derived sulfonated catalyst                                    | Cellulose  | 61.1  | 74 min | 175 | 20 |
| N-doped carbon materials                                              | Cellulose  | 61.1  | 60 min | 220 | 21 |

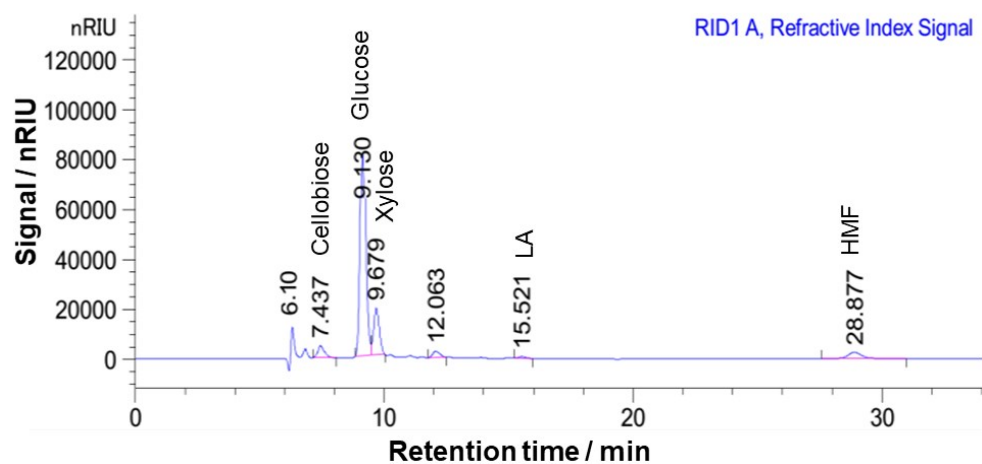

Figure S7 HPCL chromatogram of hydrolysis products of eucalyptus lignocellulose using ECG-48 under typical conditions. Reaction conditions: eucalyptus (8 g), ECG-48 h (0.5 g), HCl (40 ml of 120 ppm), using ball-milling combined with sonication

pretreatment. The reaction temperature was raised from 25 °C to 180 °C (10°/ min) for 20 min, then quickly cooled down to 25°C.

## References

1. P. Dornath, S. Ruzicky, S. Pang, L. He, P. Dauenhauer and W. Fan, *Green Chem.*, 2016, **18**, 6637-6647.
2. X. Liu, P. Fatehi and Y. Ni, *Ind. Eng. Chem. Res.*, 2011, **50**, 11706-11711.
3. J. Tian, J. Wang, S. Zhao, C. Jiang, X. Zhang and X. Wang, *Cellul.*, 2010, **17**, 587-594.
4. T. Komanoya, H. Kobayashi, K. Hara, W.-J. Chun and A. Fukuoka, *Appl. Catal., A*, 2011, **407**, 188-194.
5. L. Kupiainen, J. Ahola and J. Tanskanen, *Bioresour Technol.*, 2012, **116**, 29-35.
6. A. Onda, T. Ochi and K. Yanagisawa, *Green Chem.*, 2008, **10**, 1033-1037.
7. H. Kobayashi, T. Komanoya, K. Hara and A. Fukuoka, *ChemSusChem*, 2010, **3**, 440-443.
8. S. Wuttke, A. Negoj, N. Gheorghe, V. Kuncser, E. Kemnitz, V. Parvulescu and S. M. Coman, *ChemSusChem*, 2012, **5**, 1708-1711.
9. H. Kobayashi, H. Kaiki, A. Shrotri, K. Techikawara and A. Fukuoka, *Chem. Sci.*, 2016, **7**, 692-696.
10. J. Pang, A. Wang, M. Zheng and T. Zhang, *Chem. Commun.*, 2010, **46**, 6935-6937.
11. M. Zhang, M. Wu, Q. Liu, X. Wang, T. Lv and L. Jia, *Appl. Catal., A*, 2017, **543**, 218-224.
12. S. Jin, J. Gong, C. Yang, Y. Cheng, J. Lu, Q. Yang and H. Wang, *Biomass Bioenergy*, 2020, **138**, 105611.
13. H. Xin, X. Hu, C. Cai, H. Wang, C. Zhu, S. Li, Z. Xiu, X. Zhang, Q. Liu and L. Ma, *Frontiers in chemistry*, 2020, **8**, 333.
14. L. Qin, T. Ishizaki, N. Takeuchi, K. Takahashi, K. H. Kim and O. L. Li, *ACS Sustainable Chem. Eng.*, 2020, **8**, 5837-5846.
15. S. Carlier and S. Hermans, *Front. Chem.*, 2020, **8**, 347.
16. S. G. Aspromonte, A. Romero, A. V. Boix and E. Alonso, *Cellul.*, 2019, **26**, 2471-2485.
17. X. Zhang, H. Lu, K. Wu, Y. Liu, C. Liu, Y. Zhu and B. Liang, *Chinese J. Chem. Eng.*, 2020, **28**, 136-142.
18. X. Qi, L. Yan, F. Shen and M. Qiu, *Bioresour Technol.*, 2019, **273**, 687-691.
19. G. Chen, X. Wang, Y. Jiang, X. Mu and H. Liu, *Catal. Today*, 2019, **319**, 25-30.
20. E. B. Sangib, B. T. Meshesha, B. A. Demessie and F. Medina, *Biomass Convers. Biorefin.*, 2020, DOI: 10.1007/s13399-020-00720-2.
21. Y. Wang, Y. Zhang, J. Wang, M. Wang, H. Cui, W. Yi, F. Song, P. Zhao, X. Sun and Y. Xie, *Catal. Lett.*, 2020, DOI: 10.1007/s10562-020-03215-x.
